# Supplementary material for: The Heart Is an Early Target of Anthrax Lethal Toxin in Mice: A Protective Role for Neuronal Nitric Oxide Synthase (nNOS)
Source: PubMed Central journal article supplement (PMC2680977; doi:10.1371/journal.ppat.1000456), 2009-05-29
Supplement: ppat.1000456.s001.pdf [file ppat.1000456.s001.pdf]

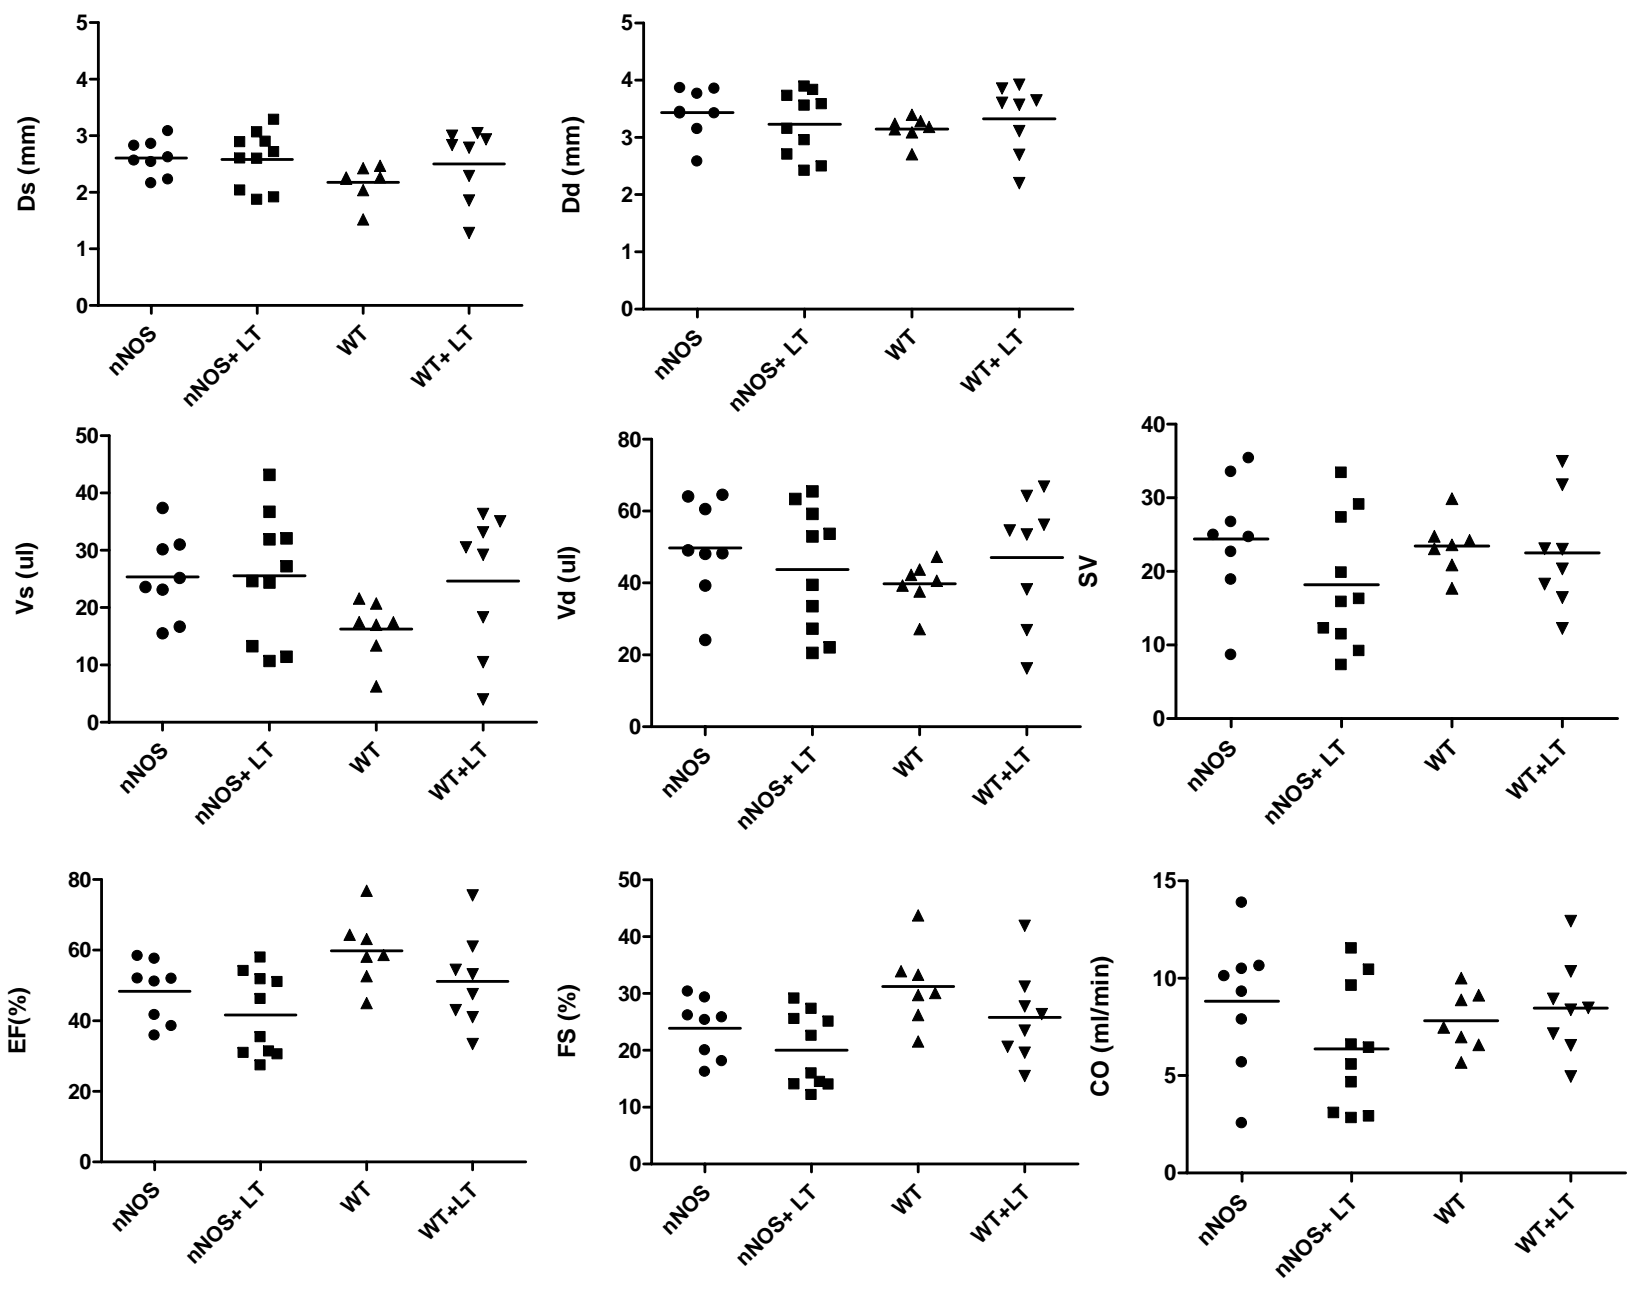

Supplemental Fig. 1
